# Supplementary material for: Development of Highly Selective 1,2,3-Triazole-containing Peptidic Polo-like Kinase 1 Polo-box Domain-binding Inhibitors
Source: PubMed Central journal article supplement (PMC6515314; doi:10.3390/molecules24081488), 2019-04-16
Supplement: molecules-24-01488-s001.pdf [file molecules-24-01488-s001.pdf]

## Supplementary Material

# Development of Highly Selective 1,2,3-Triazole-containing Peptidic Polo-like Kinase 1 Polo-box Domain-binding Inhibitors

Xue Zhi Zhao\*, Kohei Tsuji, David Hymel, Terrence R. Burke, Jr.\*

Chemical Biology Laboratory, Center for Cancer Research, National Cancer Institute, National Institutes of Health, Frederick, Maryland 21702, U.S.A.

\* Correspondence: xuezhi.zhao@nih.gov (X.Z.Z.) and burkete@nih.gov (T.R.B.Jr.); Tel.: +1-301-846-5907 (X.Z.Z.); +1-301-846-5906 (T.R.B.Jr.)

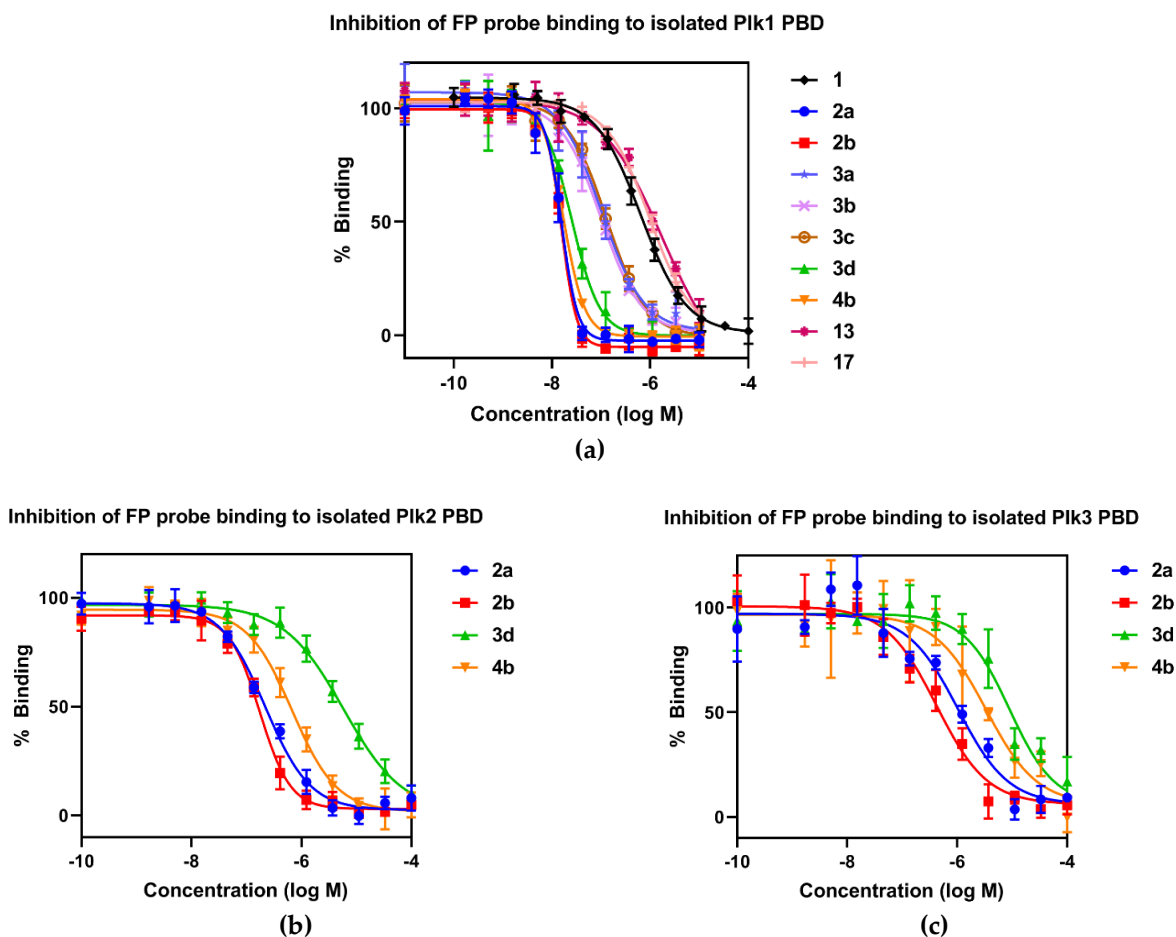

**Figure S1.** Binding data obtained from FP assays using the PBDs of Plk1 (a), Plk2 (b) and Plk3 (c).

Experimental procedures are presented in the main text.

### Inhibition of full length Plk1 by competitive ELISA

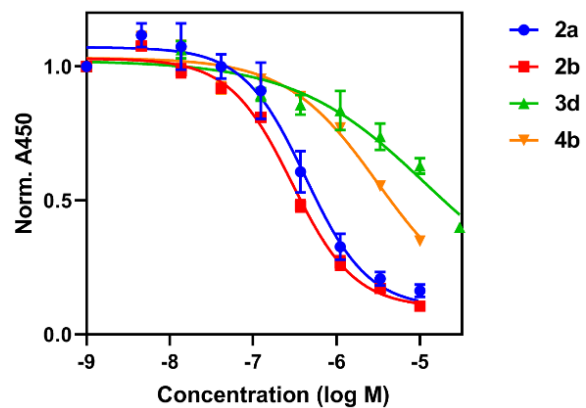

**Figure S2.** Binding data obtained from ELISA assays using full-length Plk1. Experimental procedures are presented in the main text.
